# Supplementary material for: Variation in the TAS2R38 Bitterness Receptor Gene Was Associated with Food Consumption and Obesity Risk in Koreans
Source: MDPI journal article supplement (doi:10.3390/nu11091973), 2019-08-21
Supplement: s1 [file s1]

Supplementary Table S1. The food groups analyzed in the current study

| Group                  | Food items                                                                                                                                                                                                   |
|------------------------|--------------------------------------------------------------------------------------------------------------------------------------------------------------------------------------------------------------|
| Vegetables             | all vegetables                                                                                                                                                                                               |
| Cruciferous vegetables | napa cabbage, shepherd's purse, white radish and other cruciferous vegetables                                                                                                                                |
| Dark green vegetables  | chives, crown daisy, doellingeria scaber leaf, green pepper, green pepper leaf, lettuce, perilla leaf, pimpinella brachycarpa leaf, shepherd's purse, spinach, water parsley and other dark green vegetables |
| Fruits                 | all fruits and fruits products                                                                                                                                                                               |
| Citrus fruits          | mandarin, orange and their products                                                                                                                                                                          |
| Sweets                 | cake, candy, chocolate, chocolate pie, cookie, cracker, ice cream, soda and sugar for tea                                                                                                                    |
